# Supplementary material for: Exogenous Stilbenes Improved Tolerance of Arabidopsis thaliana to a Shock of Ultraviolet B Radiation
Source: MDPI journal article supplement (doi:10.3390/plants10071282), 2021-06-24
Supplement: s1 [file s1]

**Supplementary Table S1.**Primers used for amplification of *Arabidopsis thaliana* cDNAs in real-time PCRs.

| cDNA                            | Primers, 5'-3'                                                       |
|---------------------------------|----------------------------------------------------------------------|
| <i>AtActin2</i><br>(NM_112764)  | GATTCAGATGCCCAGAAGTC,<br>TACCGTACAGATCCTTCCTG                        |
| <i>AtGAPDH</i><br>(NM_111283)   | TTGGTGACAACAGGTCAAGCA,<br>AAACTTGTCGCTCAATGCAAT                      |
| <i>AtABA1</i><br>(NM_180954)    | GCT ATG AAG GTG ATC TGC TTG TGG,<br>TTC ATA CCA TTT GGA GCA TCA GC   |
| <i>AtABA2</i><br>(AY082345)     | ATT GAT CAC TGG AGG AGC CAC AG,<br>ATT ACG AAT ATC AGG GCA CGG TG    |
| <i>AtABF3</i><br>(NM_001036708) | CAA CAT CAG CAA TGG TAA TAG TGG A,<br>CGT CCG AGG CAA GGT AAG TG     |
| <i>AtCAT1</i><br>(NM_101914)    | AGC GCT TTC GGA GCC TCG TG,<br>GGC CTC ACG TTA AGA CGA GTT GC        |
| <i>AtCSD1</i><br>(NM_100757)    | GTT GGT AGG GCT GTT GTT GTC,<br>TGG ACC TCC TTA TTA CAT CAA          |
| <i>AtCSD2</i><br>(NM_128379)    | TTA GTC TGA CCA CTG GAA ACG C,<br>GGA TGC TAA ATA AAC CAA AAT GTA    |
| <i>AtDME</i><br>(NM_120538)     | CGATGTTCTAGAGATTGGAT,<br>CAGGAAAATGCAACCTTGCC                        |
| <i>AtDML3</i><br>(NM_119567)    | GCTTAAACCCCATTTGTCTTTC,<br>TCTCATCAGGTGGAGTGTG                       |
| <i>AtKIN1</i><br>AY114587       | CCA ACA AGA ATG CCT TCC AAG C,<br>GCT GCC GCA TCC GAT ACA CT         |
| <i>AtNHX1</i><br>(NM_122597)    | CCG TGC ATT ACT ACT GGA GAC AAT,<br>GTA CAA AGC CAC GAC CTC CAA      |
| <i>AtPol</i><br>(DQ446242)      | GACTTGACGACACTGGACTA,<br>GTTTCTCCGTTGAGAGTTTCAG                      |
| <i>AtRad23</i><br>(NM_101486)   | CATAGAAGCCTTCCTTTC,<br>GTCTTCAAAATCTGCTGAG                           |
| <i>AtRad4</i><br>(BT010359)     | GTAAGAAAGTCTCGTAATGAAGA,<br>AGGTTTCCTCATCAAAGGT                      |
| <i>AtRD26</i><br>(NM_118875)    | GAT GTG AAG TTA CTG ATG GGT GAA,<br>GCG AGC CAA GTC ACA AGG AG       |
| <i>AtRD29A</i><br>(NM_124610)   | ATC ACT TGG CTC CAC TGT TGT TC,<br>ACA AAA CAC ACA TAA ACA TCC AAA G |
| <i>AtRD29B</i><br>(NM_124609)   | GGA ATC CGA AAA CCC CAT AGT C,<br>GGA GTG AAG GAG ACG CAA CAA G      |
| <i>AtSOS1</i><br>(NM_126259)    | TCG TTT CAG CCA AAT CAG AAA GT,<br>TTT GCC TTG TGC TGC TTT CC        |
| <i>AtUNG</i><br>(BT029175)      | ACGCTCAAGAGAAATCCAAGTT,<br>GCTGGTTTGCGCGAGAGAAA                      |
| <i>AtUVR2</i><br>(NM_101109)    | GCAAACGGAAATTCAATGTGGA,<br>CTTGGGATCAACAGAGTCTCTGG                   |
| <i>AtUVR3</i><br>(NM_001035626) | CCATCTAGCGCGTCACTGT,<br>GACGAACATGATAACCACATC                        |
